# Supplementary material for: Characterization of Shigella sonnei Isolate Carrying Shiga Toxin 2–Producing Gene
Source: PubMed Central journal article supplement (PMC4412214; doi:10.3201/eid2105.140621), 2015-05
Supplement: 14-0621-Techapp-s1.pdf [file 14-0621-Techapp-s1.pdf]

# Characterization of *Shigella sonnei* Isolate Carrying Shiga Toxin 2–Producing Gene

## Technical Appendix

**Technical Appendix Table.** Characteristics of 2 isolates from a patient compared with those of a *Shigella sonnei* reference strain\*

| Identification and typing tests              | Patient isolate               |                               |                               |
|----------------------------------------------|-------------------------------|-------------------------------|-------------------------------|
|                                              | FE109024                      | FE109046                      | <i>S. sonnei</i> ATCC 25931   |
| Sorbitol fermentation                        | –                             | –                             | –                             |
| Glucose fermentation                         | ±†                            | ±                             | ±                             |
| Lactose fermentation                         | –                             | –                             | –                             |
| β-galactosidase production                   | +                             | +                             | +                             |
| Saccharose fermentation                      | –                             | –                             | –                             |
| Mannitol fermentation                        | –                             | –                             | ±                             |
| Citrate fermentation                         | –                             | –                             | –                             |
| Inositol fermentation                        | –                             | –                             | –                             |
| Malonate fermentation                        | –                             | –                             | –                             |
| Arabinose fermentation                       | +                             | +                             | +                             |
| Xylose fermentation                          | –                             | –                             | –                             |
| Dulcitol fermentation                        | –                             | –                             | –                             |
| Salicine fermentation                        | –                             | –                             | –                             |
| Growth on media containing potassium cyanide | –                             | –                             | –                             |
| Indole production                            | –                             | –                             | –                             |
| Urease production                            | –                             | –                             | –                             |
| Hydrogen sulfide production                  | –                             | –                             | –                             |
| Motility                                     | –                             | –                             | –                             |
| API 20E test result                          | <i>Shigella sonnei</i> 89,2%‡ | <i>Shigella sonnei</i> 89,2%§ | <i>Shigella sonnei</i> 98,3%¶ |
| API 20E code                                 | 1104002                       | 1104002                       | 1104102                       |
| <i>S. sonnei</i> polyvalent antiserum        | +                             | +                             | +                             |
| <i>S. sonnei</i> phase I antiserum           | +                             | –                             | ±                             |
| <i>S. sonnei</i> phase II antiserum          | –                             | +                             | ±                             |
| <i>stx</i> <sub>2</sub>                      | –                             | +                             | –                             |
| <i>stx</i> <sub>2</sub> subtype              | Not applicable                | <i>stx</i> <sub>2a</sub>      | Not applicable                |
| <i>ipaH</i>                                  | +                             | +                             | Not done                      |
| <i>ial</i>                                   | +                             | +                             | Not done                      |
| <i>invE</i>                                  | +                             | –                             | Not done                      |
| <i>eaeA</i>                                  | –                             | –                             | Not done                      |
| <i>hlyA</i>                                  | –                             | –                             | Not done                      |
| <i>saa</i>                                   | –                             | –                             | Not done                      |

\**stx*<sub>2</sub>, Shiga toxin 2; *ipaH*, invasion plasmid antigen H; *ial*, invasion-associated locus; *invE*, invasion gene transcription regulator *invE*; *eaeA*, intimin; *hlyA*, enterohemolysin; *saa*, STEC autoagglutinating adhesin. *S. sonnei* ATCC 25931 forms 2 types of colonies: the smooth colony agglutinated by phase I antiserum, and the rough colony agglutinated by phase II antiserum.

†In glucose and mannitol test tubes, production of gas was also observed: ± = ferments carbohydrate, does not produce gas.‡ Test against mannitol 99%, rhamnose 75%.

§Test against mannitol 99%, rhamnose 75%.

¶Test against rhamnose 75%.
